# Supplementary material
Source: HighWire-hosted journal article supplement (https://cmaj.ca/highwire/filestream/57943/field_highwire_adjunct_files/2/in-koelewijn-3-at.pdf)
Supplement: in-koelewijn-3-at.pdf [file in-koelewijn-3-at.pdf]

**Appendix 3 (as supplied by the authors):** Multi-level linear regression analyses assessing the between groups effect at one year, accounting for the intracluster correlation (N = 488 patients).

| Independent variables                         | Fat intake                   |                    | 10logFruit                 |                    | 10logVegetables              |                    | 10logPhysical Activity       |                    |
|-----------------------------------------------|------------------------------|--------------------|----------------------------|--------------------|------------------------------|--------------------|------------------------------|--------------------|
|                                               | Est. (CI)                    | p value            | Est. (CI)                  | p value            | Est. (CI)                    | p value            | Est. (CI)                    | p value            |
| Group<br><i>Intervention = 1, Control = 0</i> | 1.1716<br>(-0.467 – 2.810)   | 0.160              | 0.0317<br>(-0.025 – 0.089) | 0.261              | 0.0470<br>(0.002 – 0.092)    | <b>0.043*</b>      | 0.4654<br>(0.059 – 0.871)    | <b>0.025*</b>      |
| Dependent at T0                               | 0.6503<br>(0.582 – 0.718)    | <b>&lt;0.001**</b> | 0.6195<br>(0.541 – 0.698)  | <b>&lt;0.001**</b> | 0.6162<br>(0.549 – 0.684)    | <b>&lt;0.001**</b> | 0.7338<br>(0.612 – 0.856)    | <b>&lt;0.001**</b> |
| Dependent at T0*group                         |                              |                    |                            |                    |                              |                    | -0.1744<br>(-0.333 – -0.015) | <b>0.032*</b>      |
| Sex<br><i>Male = 1, female = 0</i>            | 0.9602<br>(0.185 – 1.736)    | <b>0.015*</b>      |                            |                    | 0.0010<br>(-0.046 – 0.048)   | 0.965              |                              |                    |
| Sex*group                                     |                              |                    |                            |                    | -0.0866<br>(-0.152 – -0.021) | <b>0.010**</b>     |                              |                    |
| Age                                           |                              |                    |                            |                    |                              |                    |                              |                    |
| SES<br><i>Low = 1, high = 0</i>               | 0.9262<br>(-0.535 – 2.387)   | 0.213              |                            |                    |                              |                    |                              |                    |
| <i>Intermediate = 1, high = 0</i>             | 1.3723<br>(-0.077 – 2.821)   | 0.063              |                            |                    |                              |                    |                              |                    |
| SES*group                                     | -1.1049<br>(-3.11 – 0.906)   | 0.280              |                            |                    |                              |                    |                              |                    |
|                                               | -2.4384<br>(-4.367 – -0.510) | <b>0.013*</b>      |                            |                    |                              |                    |                              |                    |
| High blood pressure<br><i>Yes = 1, no = 0</i> |                              |                    |                            |                    |                              |                    |                              |                    |
| High cholesterol<br><i>Yes = 1, no = 0</i>    |                              |                    | -0.0628 (-0.118 – -0.008)  | <b>0.024*</b>      |                              |                    |                              |                    |
| High cholesterol*group                        |                              |                    |                            |                    |                              |                    |                              |                    |
| Obesity<br><i>Yes = 1, no = 0</i>             | -0.9214<br>(-1.724 – -0.119) | <b>0.024*</b>      |                            |                    | 0.0371<br>(0.001 – 0.073)    | <b>0.042*</b>      |                              |                    |
| Diabetes<br><i>Yes = 1, no = 0</i>            |                              |                    |                            |                    | -0.0586<br>(-0.107 – -0.010) | <b>0.018*</b>      |                              |                    |

Est. (CI) = Estimation, unstandardised (Confidence Interval).

Intraclass correlation coefficient (ICC): fat intake 0.021, 10logFruit 0.001, 10logVegetables 0.006, 10logPhysical Activity -0.002.
